# Supplementary material for: Unveiling CRESS DNA Virus Diversity in Oysters by Virome
Source: MDPI journal article supplement (doi:10.3390/v16020228), 2024-01-31
Supplement: s1 [file s1]

MH617165 (AXH75487)  
NC\_027781 (YP\_009163900)  
KR528545  
KR528561  
NC\_027793 (YP\_009163922)  
KR528562  
NC\_027794 (YP\_009163924)  
KR528551  
NC\_027786 (YP\_009163909)  
MH649155 (AXQ66327)  
KJ547646  
MH649007 (AXQ65921)  
YJd\_1332403  
KP153436 (ALE29662)  
KP153435 (ALE29661)  
KP153434  
YJr\_1251198  
KM874347  
NC\_026646 (YP\_009126925)  
YJr\_1249903  
MH616757 (AXH73549)  
MH648973 (AXQ65784)  
KX828612 (APC94134)  
KM874302  
NC\_026629 (YP\_009126884)  
SZd\_165780  
YJd\_1344351  
YJr\_138384  
YJr\_1250706  
YJr\_1252474  
T8S\_1427177  
NC\_027787 (YP\_009163912)  
JF938078 (AEL87784)  
YJr\_116749  
YJr\_1179478  
YJr\_1253118  
YJr\_1137666  
MK012507 (AYP28903)  
Hsd\_15354433  
YJr\_1251171  
YJr\_1108531  
YJr\_183831  
YJr\_1250514  
KR528556  
NC\_027789 (YP\_009163915)  
YJd\_1126163  
MH649116 (AXQ66218)  
MH617281 (AXH75980)  
KY487923 (AUM61913)  
YJd\_1334459  
MH648785 (AXQ65312)  
MH617499 (AXH77011)  
KY312556 (AUW34332)  
DTRG01000821 (HHZ97611)  
YJd\_1351511  
BAKC01000106 (GAC77869)  
MH617921 (AXH78712)  
YJd\_1374311  
MH649093 (AXQ66163)  
YJr\_122530  
ZHd\_1462894  
YJr\_1252645  
ZHd\_1289089  
KP153399  
NC\_029580 (YP\_009237498)  
MH617033 (AXH74836)  
MH617118 (AXH75267)  
ML\_1\_35272  
QZd\_150922  
YJd\_1191657  
YJd\_1247829  
MH618007 (AXH78995)

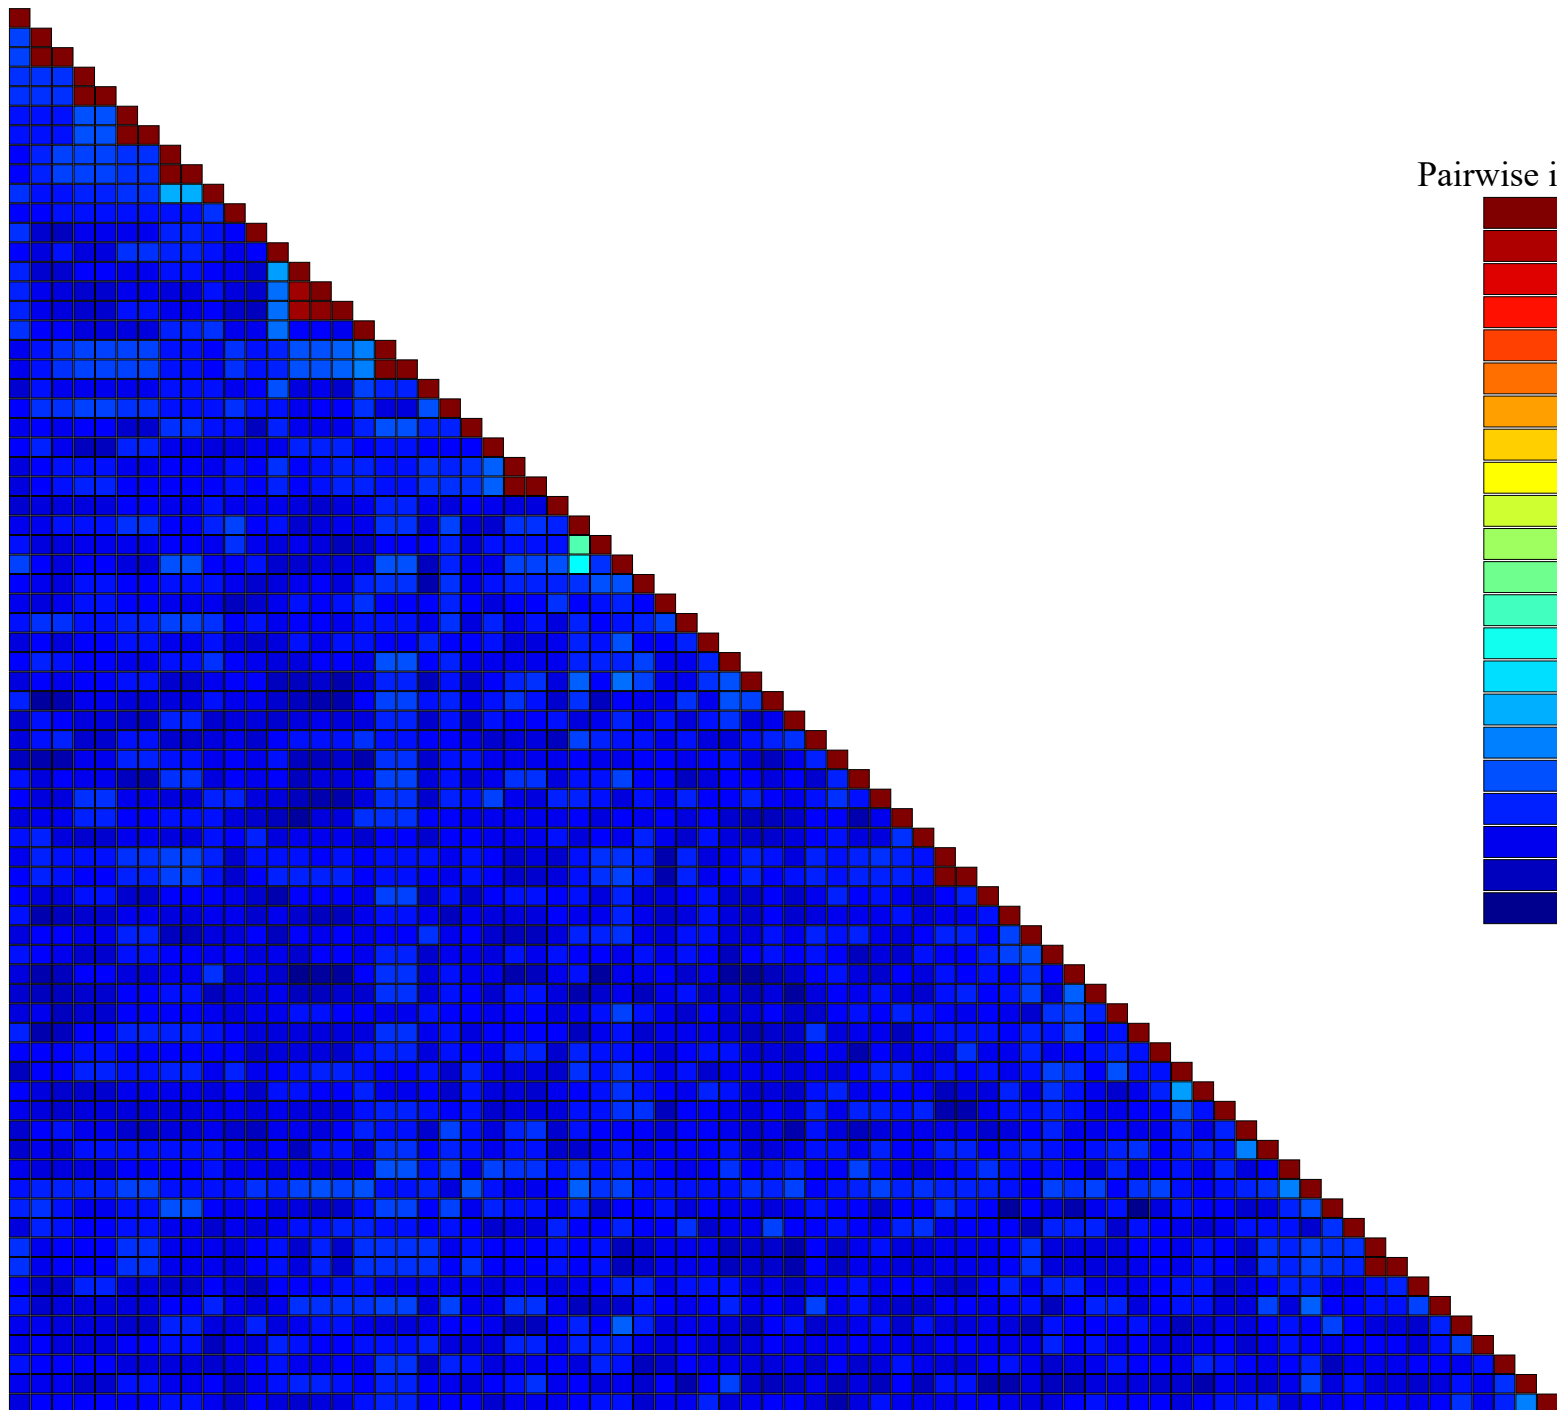

Pairwise identity %

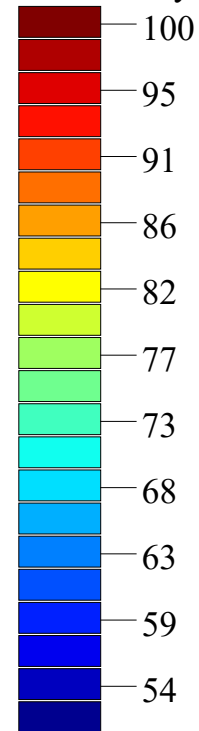

MH617165  
NC\_027781  
KR528545  
KR528561  
NC\_027793  
NC\_027794  
KR528562  
KR528551  
NC\_027786  
MH649155  
KJ547646  
MH649007  
YJd1332403  
KP153436  
KP153435  
KP153434  
YJr1251198  
KM874347  
NC\_026646  
YJr1249903  
MH616757  
MH648973  
KX828612  
KM874302  
NC\_026629  
SZd165780  
YJd1344351  
YJr138384  
YJr1250706  
YJr1252474  
T8S1427177  
NC\_027787  
JF938078  
YJr116749  
YJr1179478  
YJr1253118  
YJr1137666  
MK012507  
Hsd15354433  
YJr1251171  
YJr1108531  
YJr183831  
YJr1250514  
KR528556  
NC\_027789  
YJd1126163  
MH649116  
MH617281  
KY487923  
YJd1334459  
MH648785  
MH617499  
KY312556  
DTRG01000821  
YJd1351511  
BAKC01000106  
MH617921  
YJd1374311  
MH649093  
YJr122530  
ZHd1462894  
YJr1252645  
ZHd1289089  
KP153399  
NC\_029580  
MH617033  
MH617118  
ML135272  
QZd150922  
YJd1191657  
YJd1247829  
MH618007
