# Supplementary material for: Unveiling CRESS DNA Virus Diversity in Oysters by Virome
Source: MDPI journal article supplement (doi:10.3390/v16020228), 2024-01-31
Supplement: s1 [file s1]

**Supplementary table 1. Genomic sequence information of oyster-associated CRESS DNA viruses**

| Genome ID    | Length | Replication protein | Capsid protein | Total TPM | Detected libraries/Total libraries |
|--------------|--------|---------------------|----------------|-----------|------------------------------------|
| HSd1-5354433 | 1970   | 1010 .. 1813        | -              | 2.56      | 9/32                               |
| QZd1-50922   | 2154   | 1 .. 1092           | 1115 .. 1942   | 9.79      | 4/32                               |
| T8S1-427177  | 2096   | 1206 .. 2096        | 157 .. 1029    | 3.06      | 6/32                               |
| ZHd1-289089  | 2427   | 1450 .. 2427        | 534 .. 1460    | 15.36     | 4/32                               |
| YJd1-126163  | 2022   | 750 .. 1847         | 2 .. 712       | 4.81      | 3/32                               |
| SZd1-65780   | 2084   | 1169 .. 2059        | 237 .. 1127    | 57.63     | 8/32                               |
| ML1-35272    | 2252   | 1 .. 909            | 1008 .. 1997   | 1.39      | 7/32                               |
| ZHd1-462894  | 2899   | 1530 .. 2441        | 292 .. 1311    | 167.47    | 17/32                              |
| YJd1-191657  | 1891   | 1 .. 750            | 822 .. 1604    | 76.55     | 18/32                              |
| YJd1-247829  | 1995   | 132 .. 980          | 1053 .. 1925   | 275.34    | 25/32                              |
| YJd1-332403  | 1708   | 41 .. 577           | 623 .. 1348    | 5.32      | 8/32                               |
| YJd1-334459  | 1702   | 197 .. 919          | 965 .. 1702    | 40.40     | 11/32                              |
| YJd1-344351  | 1587   | 653 .. 1384         | 1 .. 675       | 133.95    | 12/32                              |
| YJd1-351511  | 2283   | 383 .. 1345         | 1342 .. 2283   | 225.52    | 15/32                              |
| YJd1-374311  | 1840   | 232 .. 1041         | 1016 .. 1840   | 13.74     | 10/32                              |
| YJr1-108531  | 1790   | 990 .. 1583         | 1 .. 894       | 8.17      | 5/32                               |
| YJr1-137666  | 1881   | 1 .. 678            | 1122 .. 1907   | 12.48     | 2/32                               |
| YJr1-16749   | 1833   | 906 .. 1691         | 257 .. 925     | 177.49    | 14/32                              |
| YJr1-179478  | 1706   | 596 .. 1444         | 7 .. 657       | 8.76      | 3/32                               |
| YJr1-22530   | 1631   | 647 .. 1330         | 1 .. 669       | 2.87      | 3/32                               |
| YJr1-249903  | 1662   | 315 .. 962          | 916 .. 1662    | 7.50      | 10/32                              |
| YJr1-250514  | 1895   | 1206 .. 1895        | 1 .. 840       | 12.53     | 7/32                               |

| Genome ID   | Length | Replication protein | Capsid protein | Total TPM | Detected libraries/Total libraries |
|-------------|--------|---------------------|----------------|-----------|------------------------------------|
| YJr1-250706 | 1438   | 678 .. 1421         | 2 .. 739       | 137.76    | 16/32                              |
| YJr1-251171 | 1683   | 806 .. 1489         | 1 .. 813       | 8.71      | 14/32                              |
| YJr1-251198 | 1650   | 230 .. 850          | 816 .. 1487    | 9.58      | 3/32                               |
| YJr1-252474 | 1708   | 1 .. 684            | 659 .. 1468    | 12.59     | 7/32                               |
| YJr1-252645 | 1601   | 146 .. 691          | 688 .. 1458    | 10.06     | 5/32                               |
| YJr1-253118 | 1674   | 759 .. 1418         | -              | 10.51     | 6/32                               |
| YJr1-38384  | 1633   | 680 .. 1447         | 28 .. 702      | 347.97    | 19/32                              |
| YJr1-83831  | 1 760  | 282 .. 857          | 1080 .. 1760   | 7.26      | 7/32                               |
