# Supplementary material for: Unveiling CRESS DNA Virus Diversity in Oysters by Virome
Source: MDPI journal article supplement (doi:10.3390/v16020228), 2024-01-31
Supplement: s1 [file s1]

A

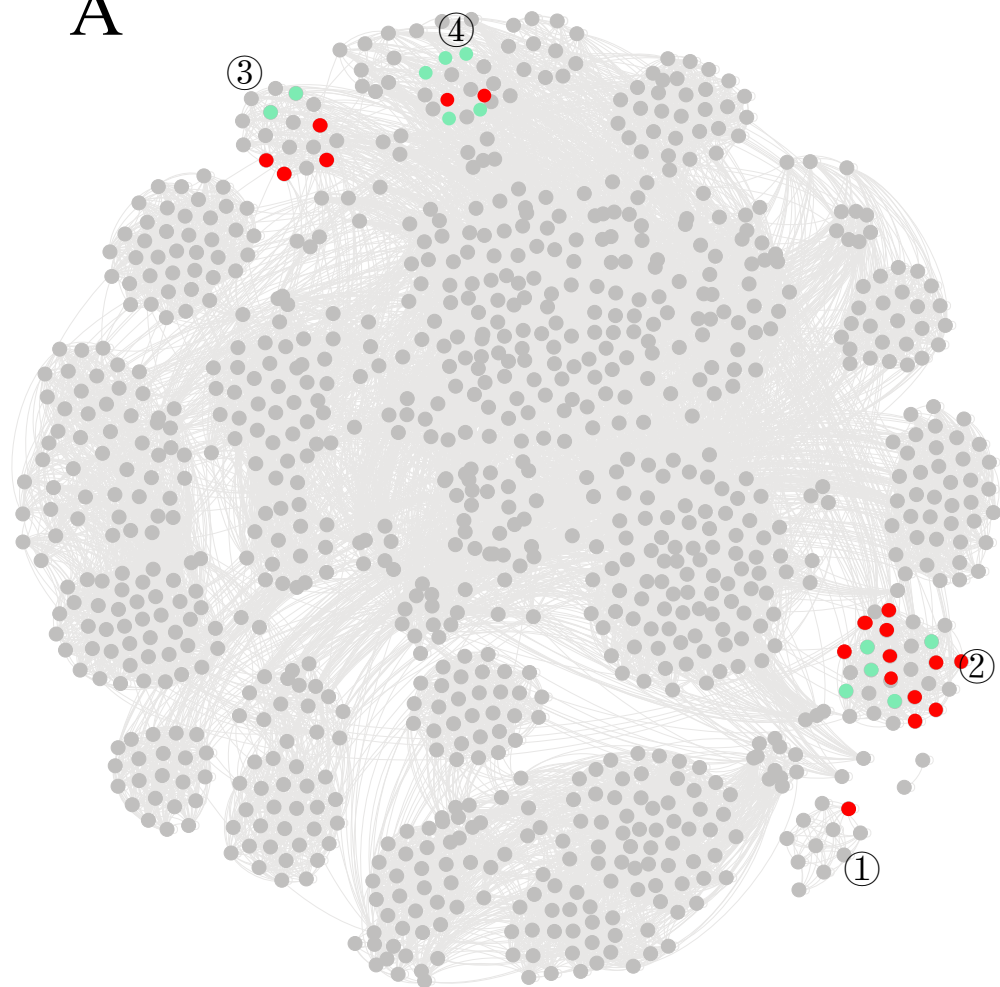

B

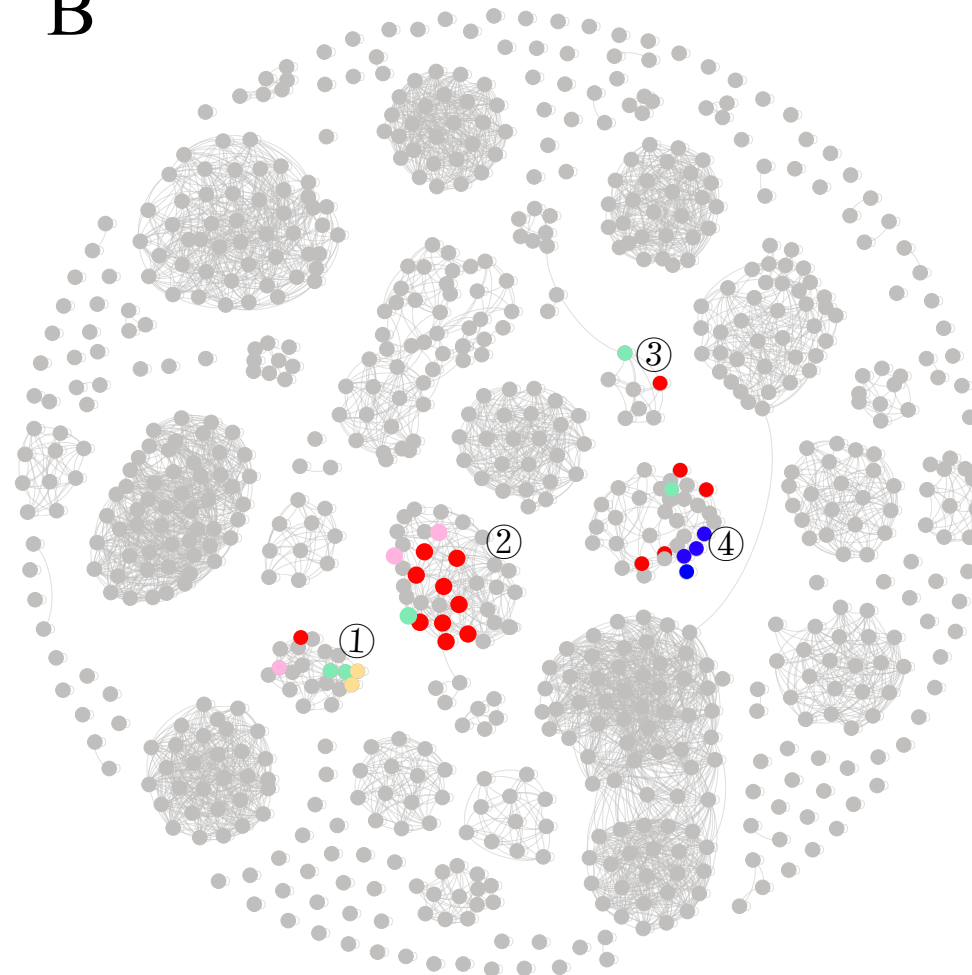

● DOV   
 ● Circoviridae   
 ● discarded due to unconserved helicase   
 ● Crassircovirus   
 ● CRESS3   
 ● CRESS DNA virus
