# Supplementary material for: Unveiling CRESS DNA Virus Diversity in Oysters by Virome
Source: Viruses. 2024 Jan 31;16(2):228. doi: 10.3390/v16020228 (PMC10892194; doi:10.3390/v16020228)
Supplement: Supplementary file 1 [file viruses-16-00228-s001.zip]

Archive with 4 entries (4 files):
- Supplementary Figure S1 Similarity clustering networks of oyster-associated CRESS DNA virus sequences.pdf
- Supplementary Figure S2. Genome average nucleotide identity heatmap.pdf
- Supplementary Table S1 Genomic sequence information of oyster-associated CRESS DNA viruses.pdf
- Supplementary Table S2 Analysis of the abundance of oyster-associated CRESS DNA Viruses.xlsx
