# Supplementary material for: Unveiling CRESS DNA Virus Diversity in Oysters by Virome
Source: Viruses. 2024 Jan 31;16(2):228. doi: 10.3390/v16020228 (PMC10892194; doi:10.3390/v16020228)
Supplement: Supplementary file 1 [file viruses-16-00228-s001.zip › Supplementary Table S2 Analysis of the abundance of oyster-associated CRESS DNA Viruses.xlsx]

## Sheet: Sheet1
	ZHd1-289089	ZHd1-462894	YJr1-251198	YJr1-250706	YJr1-250514	YJr1-179478	YJd1-247829	YJr1-253118	YJd1-191657	YJd1-126163	QZd1-50922	YJd1-374311	YJr1-251171	YJr1-252474	YJr1-249903	HSd1-5354433	ML1-35272	YJr1-16749	YJd1-344351	YJd1-332403	SZd1-65780	YJd1-351511	YJd1-334459	YJr1-38384	YJr1-83831	YJr1-252645	YJr1-137666	YJr1-22530	T8S1-427177	YJr1-108531
ChLJ1511Da	0	12.2124	0	0.12531	0	0	0.106975	0	0.110123	0	0	0	0.726306	0	0.13285	0.448319	0	0.120457	0	0.596749	0.200999	0.0967135	0	0	0.250906	0.633746	0	0	0.197405	0
ChLJ1511Db	0	8.44902	0	0.121632	0	0	0.20767	0	0	0	0	0	0.352492	0	0.12895	0.761525	0	0	0	1.27431	0.0975489	0	0	0.246198	0	0	0	0	0	0
ChLJ1511Dc	0	10.1799	0	0	0	0	0.132002	0	0	0	0	0	1.19496	0	0.16393	0.414901	0	0	0	0.589085	0.124011	0.119339	0	0	0	0.156402	0	0	0.121793	0
ChLJ1511Ra	0	0	0	1.93473	0.643985	0	0.2541	0	0	0	0	0	0	0	0.473341	0	0	82.117	0	0	0	0.114862	0	0	1.04296	0	0	0	0	0
ChQZ1511Da	0	0	0	0.0675869	0	0.0698055	0.0576978	0	0.118791	0	0.934025	0.0647218	0	0	0	0	0	0	0	0	0	0	0	0	0	0	0	0	0	0
ChQZ1511Db	0	0.299833	0	0	0	0	0.123441	0	0	0	0.777116	0	0	0	0	0	0	0	0.185176	0	0	0	0	0.548347	0	0	0	0	0	0
ChQZ1511Dc	0	0	0	0	0	0	0	0	0	0	7.95107	0	0	0	0	0	0	0	0	0	0	0	0	0	0	0	0	0	0	0
ChQZ1511Rc	0	0.479756	0	0	0	0	0.112866	0	0	0	0	0	0	0	0	0	0	0	0	0	0.212067	0.102039	0	0.267611	0	0	0	0	0	0
ChSZ1604Da	0	0	0	0	0	0	0.144989	0	0.149255	0	0.130395	0	0	0	0	0.0759534	0.0625275	0	0	0	38.8884	0.0655402	0.0811873	0	0	0	0	0	0.200664	0
ChSZ1604Db	0	0	0	0.157618	0	0	0	0	0.138515	0	0	0.150936	0	0	0	0	0.116056	0	0.483275	0	17.6974	0	0	0.159519	0	0	0	0	0	0
ChSZ1604Dc	0	0	0	0	0	0	0.115195	0.142033	0	0	0	0	0.130353	0	0	0	0.198716	0	0	0	0.324665	0.104145	0	0	0	0	0	0.145778	0.106287	0
ChSZ1604Rc	0	0	0	0.37271	0	0	0	0	0.10918	0	0	0	0	0	0	0	0	1.67194	0	0	0	0	0	3.64632	0	0	0	0	0	0
ChTW1511Da	4.97304	41.7232	0	0	0	0	0.626534	0	0	0	0	0	0	0.466258	0	0	0.180132	0	0	0.233003	0	0	2.57277	0	0	0	0	0	0	0
ChTW1511Db	0	0	0	0	0.25018	0	3.94857	0	1.52429	0	0	0.276829	0.558515	0	0	0	0	1.38943	0	0	0	0	0	0.292571	0	0	0	0	0	0
ChTW1511Dc	0	0	0	2.93281	0	0	3.50516	0	0.515472	0	0	0	1.13325	0	0	0	0	0.281921	0.350402	0	0	0	0.280391	1.73075	0	0.296648	0	0	0	0
ChTW1511Ra	0	0	0	1.41902	0	0	0	0	0	0	0	0	0	0	0	0	0	0	0	0	0	0.156455	0	2.05162	0	0	0	0	0	0
ChTW1511Rb	0	0	0	4.67986	0	0	0.0815328	0	0	0	0	0	0.369043	0	0	0	0	0.183616	11.631	0	0	0.147423	0	35.7489	0.191232	0	0	0	0	0
ChTW1511Rc	0	0.0572298	0	93.8249	0	0	0	0.232406	0	0	0	0	0	0	0.585211	0	0	6.57965	85.2099	0	0.0885408	0	0	116.195	0	0	0	0	0	0
ChYJ1509Da	0	0.582795	0.0461753	0.281061	0.0187105	0.0223298	110.556	0	24.3578	1.01657	0	12.2193	0.104426	0.263716	0.137526	0.0386747	0	0.0207827	3.35759	1.7297	0	5.90692	11.5338	0.176141	0	0	0	0	0	0.340511
ChYJ1509Db	0	0.223981	0	0.144024	0	0	35.5328	0	18.6056	0.118807	0	0	0	0	0	0.128818	0.636283	0	0.147199	0.274347	0	8.2256	7.98628	0.291523	0	0	0	0	0	0
ChYJ1509Dc	0.129453	1.3865	0	0.769406	0	0	112.49	0	28.6759	3.67722	0	0	0.861243	0.16992	0	0	0.131292	0.342806	1.66804	0.339656	0	210.005	13.9788	1.90061	0	0	0	0	0.280895	0.351041
ChYJ1509Ra	0	0.117609	0	0	0	0	0.0968395	0	0.498445	0	0	0	0	0	1.32289	0	0	75.1309	0.401724	0	0	0.08755	0	78.7033	0	0	0	0	0	0
ChYJ1509Rb	0	0.0517939	5.12138	0	1.03761	8.66822	0.255883	9.67525	0	0	0	0	0	0	2.75405	0	0	0	0	0	0	0	0	0	0	0	0	0	0	0.885155
ChYJ1509Rc	0	0	4.41331	12.0553	7.58239	0	0.141123	0	0.145276	0	0	0.582082	1.43723	10.6056	1.40206	0	0	8.10431	13.966	0	0	0.255172	0.316091	58.4589	3.14448	8.52767	12.3882	2.67883	0	6.34629
ChZH1511Da	4.01651	47.7399	0	0	0.0368296	0	1.8165	0	0.0747981	0	0	0.0568094	0.369992	1.24121	0	0.0380635	0.0626704	0.409084	0.18494	0.283727	0	0	1.22059	0.850549	0	0	0	0.0459749	0	0.251347
ChZH1511Db	6.24382	43.6913	0	0	0	0	1.40454	0	0.328608	0	0	0.0455472	0.361217	0.025941	0	0	0	0.143777	0	0	0	0.0577187	2.28795	0	0.0748704	0	0	0	0	0
ChZH1511Dc	0	0.0382676	0	0.295282	0	0	3.21398	0.0777011	0.843357	0	0	0.176869	0.927045	0.175727	0	0.132052	0	0.993455	0	0	0	0	0.070576	0.0747108	0	0.448008	0	0	0	0
ChZH1511Ra	0	0.161397	0	0	2.96389	0	0.26579	0	0.136805	0	0	0	0	0	0	0	0	0	0	0	0	0	0	0.6302	0	0	0	0	0	0
ChZH1511Rb	0	0.0789113	0	0	0	0	0.0649756	0.0801133	0.133775	0	0	0.0728857	0	0	0.403459	0	0	0	0	0	0	0	0.0727671	0	0.457192	0	0	0	0	0
ChZH1511Rc	0	0	0	18.5828	0	0	0.0812503	0.300539	0.0836412	0	0	0.0911416	0.183882	0	0	0	0	0	16.3663	0	0	0.0734563	0	45.9953	2.09626	0	0.089155	0	0	0
S5.D.2	0	0	0	0	0	0	0	0	0	0	0	0	0	0	0	0.525661	0	0	0	0	0	0	0	0	0	0	0	0	0	0
T8S170523	0	0	0	0	0	0	0	0	0	0	0	0	0	0	0	0	0	0	0	0	0	0	0	0	0	0	0	0	2.1552	0
Total TPM	15.3628	167.474	9.58086	137.764	12.5336	8.76036	275.336	10.508	76.5497	4.8126	9.7926	13.7371	8.70995	12.9484	7.50427	2.56397	1.38768	177.489	133.952	5.32057	57.6336	225.518	40.4012	347.968	7.2579	10.0625	12.4774	2.87058	3.06224	8.17434
	DNA libraries
	RNA libraries

## Sheet: Sheet2
	检测到文库的个数	Total FPKM
YJd1-k141_247829	25	275.336
YJr1-k141_38384	19	347.968
YJd1-k141_191657	18	76.5497
ZHd1-k141_462894	17	167.474
YJr1-k141_250706	16	137.764
YJd1-k141_351511	15	225.518
YJr1-k141_251171	14	8.70995
YJr1-k141_16749	14	177.489
YJd1-k141_344351	12	133.952
YJd1-k141_334459	11	40.4012
YJd1-k141_374311	10	13.7371
YJr1-k141_249903	10	7.50427
HSd1-k141_5354433	9	2.56397
YJd1-k141_332403	8	5.32057
SZd1-k141_65780	8	57.6336
YJr1-k141_250514	7	12.5336
YJr1-k141_252474	7	12.9484
ML1-k141_35272	7	1.38768
YJr1-k141_83831	7	7.2579
YJr1-k141_253118	6	10.508
T8S1-k141_427177	6	3.06224
YJr1-k141_252645	5	10.0625
YJr1-k141_108531	5	8.17434
ZHd1-k141_289089	4	15.3628
QZd1-k141_50922	4	9.7926
YJr1-k141_251198	3	9.58086
YJr1-k141_179478	3	8.76036
YJd1-k141_126163	3	4.8126
YJr1-k141_22530	3	2.87058
YJr1-k141_137666	2	12.4774
